# Supplementary material for: Development of a valid and reliable software customization model for SaaS quality through iterative method: perspectives from academia
Source: PeerJ journal article supplement (doi:10.7717/peerj-cs.294), 2020-09-21
Supplement: Appendix_A,_B,_C.pdf [file Appendix_A%2C_B%2C_C.pdf]

## Appendix A

### Content Validity Questionnaire (Round 1)

#### SaaS Personalization

**Personalization** refers to techniques and solutions that provide transparent customization without a need for the users to be informed and it is initiated by the application.

Please indicate to what relevancy you feel these statements represent the **personalization** approach in the SaaS Multi-Tenant context.

| Questions                                                                                                                                                                                   | Not relevant          | Somewhat relevant     | Relevant              | Very relevant         | Comment (if any) |
|---------------------------------------------------------------------------------------------------------------------------------------------------------------------------------------------|-----------------------|-----------------------|-----------------------|-----------------------|------------------|
| 1. Personalization involves amassing data sets correlating to individual user.                                                                                                              | <input type="radio"/> | <input type="radio"/> | <input type="radio"/> | <input type="radio"/> |                  |
| 2. Personalization seeks to integrate users' autonomous selections within SaaS services.                                                                                                    | <input type="radio"/> | <input type="radio"/> | <input type="radio"/> | <input type="radio"/> |                  |
| 3. Personalization involves assembling data on clients' activities regarding individual services.                                                                                           | <input type="radio"/> | <input type="radio"/> | <input type="radio"/> | <input type="radio"/> |                  |
| 4. Personalization concerns sets of potential services which can be presented to users.                                                                                                     | <input type="radio"/> | <input type="radio"/> | <input type="radio"/> | <input type="radio"/> |                  |
| 5. Personalization within SaaS entails complex methods for recommending suitable services according to users' established partialities, user profiles, data usage, and service directories. | <input type="radio"/> | <input type="radio"/> | <input type="radio"/> | <input type="radio"/> |                  |
| 6. SaaS-based personalization considers the meaning (semantics) of data, in addition to formulating suggestions and recommendations.                                                        | <input type="radio"/> | <input type="radio"/> | <input type="radio"/> | <input type="radio"/> |                  |
| 7. SaaS-based personalization uses runtime behavior adaptation facilities that can creatively modify the behavior of SaaS applications in accordance with the context of their performance. | <input type="radio"/> | <input type="radio"/> | <input type="radio"/> | <input type="radio"/> |                  |
| 8. Information sources for SaaS-based personalization can originate from a specific user or from tenant communities.                                                                        | <input type="radio"/> | <input type="radio"/> | <input type="radio"/> | <input type="radio"/> |                  |

## SaaS Configuration

**Configuration** refers to techniques and solutions that offer a pre-defined setting for the alteration of application functions within the pre-defined scope.

Please indicate to what relevancy you feel these statements represent the **configuration** approach in the SaaS Multi-Tenant context.

| Questions                                                                                                                                                                                                                                   | Not relevant          | Somewhat relevant     | Relevant              | Very relevant         | Comment (if any) |
|---------------------------------------------------------------------------------------------------------------------------------------------------------------------------------------------------------------------------------------------|-----------------------|-----------------------|-----------------------|-----------------------|------------------|
| 1. Configuration typically maintains diversity by establishing pre-defined parameters and options.                                                                                                                                          | <input type="radio"/> | <input type="radio"/> | <input type="radio"/> | <input type="radio"/> |                  |
| 2. Configuration can also be operated in a standalone way by employing techniques to modify the functions of applications within established limits. For example, in relation to the wizards provided by the customization of UI utilities. | <input type="radio"/> | <input type="radio"/> | <input type="radio"/> | <input type="radio"/> |                  |
| 3. SaaS service providers have developed and captured sets of services and plugins, from which tenants can make selections and perform configurations.                                                                                      | <input type="radio"/> | <input type="radio"/> | <input type="radio"/> | <input type="radio"/> |                  |
| 4. Tenants can create customization based on templates.                                                                                                                                                                                     | <input type="radio"/> | <input type="radio"/> | <input type="radio"/> | <input type="radio"/> |                  |
| 5. Tenants can select their own workflow templates and items relating to SaaS application templates from the template repository.                                                                                                           | <input type="radio"/> | <input type="radio"/> | <input type="radio"/> | <input type="radio"/> |                  |
| 6. A set of components are provided in the application template which facilitates a variety of tenant needs. By making a choice from the relevant component set, tenants can personalize each customization point.                          | <input type="radio"/> | <input type="radio"/> | <input type="radio"/> | <input type="radio"/> |                  |
| 7. When a tenant wishes to subscribe to the SaaS application, the capabilities of each feature within the system are analyzed to determine whether they ought to be assimilated within the application.                                     | <input type="radio"/> | <input type="radio"/> | <input type="radio"/> | <input type="radio"/> |                  |
| 8. Configuration can manage incongruities by permitting the client to establish set pre-defined parameters and options within the context of the runtime.                                                                                   | <input type="radio"/> | <input type="radio"/> | <input type="radio"/> | <input type="radio"/> |                  |
| 9. The configuration of the SaaS application involves disabling or excluding some features of the application.                                                                                                                              | <input type="radio"/> | <input type="radio"/> | <input type="radio"/> | <input type="radio"/> |                  |

## SaaS Composition

**Composition** refers to techniques and solutions that bring together a distinct collection of pre-defined application components that jointly amount to a custom solution.

Please indicate to what relevancy you feel these statements represent the **composition** approach in the SaaS Multi-Tenant context.

| Questions                                                                                                                                                                  | relevant              | Not                   | Somewhat relevant     | Relevant              | Very relevant         | Comment (if any) |
|----------------------------------------------------------------------------------------------------------------------------------------------------------------------------|-----------------------|-----------------------|-----------------------|-----------------------|-----------------------|------------------|
| 1. The multiple interacting components of the SaaS application are consolidated, and new application components can be shared between multiple SaaS tenants and end users. | <input type="radio"/> | <input type="radio"/> | <input type="radio"/> | <input type="radio"/> | <input type="radio"/> |                  |
| 2. Composing different collaboration components is done according to the runtime of the SaaS application.                                                                  | <input type="radio"/> | <input type="radio"/> | <input type="radio"/> | <input type="radio"/> | <input type="radio"/> |                  |
| 3. The composition of SaaS components takes into account the subset of components.                                                                                         | <input type="radio"/> | <input type="radio"/> | <input type="radio"/> | <input type="radio"/> | <input type="radio"/> |                  |
| 4. The composition approach supports the decomposition of SaaS components.                                                                                                 | <input type="radio"/> | <input type="radio"/> | <input type="radio"/> | <input type="radio"/> | <input type="radio"/> |                  |
| 5. Performing the composition of SaaS application components considers the relationships and dependencies between these components.                                        | <input type="radio"/> | <input type="radio"/> | <input type="radio"/> | <input type="radio"/> | <input type="radio"/> |                  |

## SaaS Extension

**Extension** refers to techniques and solutions that stretch the functionality of the application by implanting the custom code in pre-defined places of application's code.

Please indicate to what relevancy you feel these statements represent the **extension** approach in the SaaS Multi-Tenant context.

| Questions                                                                                                           | relevant              | Not                   | Somewhat relevant     | Relevant              | Very relevant         | Comment (if any) |
|---------------------------------------------------------------------------------------------------------------------|-----------------------|-----------------------|-----------------------|-----------------------|-----------------------|------------------|
| 1. The SaaS application is extended by adding a custom code to extend the application through custom functionality. | <input type="radio"/> | <input type="radio"/> | <input type="radio"/> | <input type="radio"/> | <input type="radio"/> |                  |

| Questions                                                                                                                                             | relevant              | Not                   | Somewhat              | Relevant              | Very                  | Comment  |
|-------------------------------------------------------------------------------------------------------------------------------------------------------|-----------------------|-----------------------|-----------------------|-----------------------|-----------------------|----------|
|                                                                                                                                                       | relevant              | relevant              | relevant              | relevant              | relevant              | (if any) |
| 2. The SaaS application provides a set of extension points which permit a customized service to be plugged in at virtually points in the application. | <input type="radio"/> | <input type="radio"/> | <input type="radio"/> | <input type="radio"/> | <input type="radio"/> |          |
| 3. Extending an existing object can happen at SaaS application runtime.                                                                               | <input type="radio"/> | <input type="radio"/> | <input type="radio"/> | <input type="radio"/> | <input type="radio"/> |          |
| 4. The SaaS service provider supplies an open platform and an API, which allows developers to inject custom codes into business object layers.        | <input type="radio"/> | <input type="radio"/> | <input type="radio"/> | <input type="radio"/> | <input type="radio"/> |          |
| 5. These extension points can either be replacements for existing objects or extensions to them.                                                      | <input type="radio"/> | <input type="radio"/> | <input type="radio"/> | <input type="radio"/> | <input type="radio"/> |          |
| 6. An extension may be private to an individual tenant or shared by multiple tenants.                                                                 | <input type="radio"/> | <input type="radio"/> | <input type="radio"/> | <input type="radio"/> | <input type="radio"/> |          |

## SaaS Integration

**Integration** refers to techniques and solutions that Implement third-party components designed to work with the application.

Please indicate to what relevancy you feel these statements represent the **integration** approach in the SaaS Multi-Tenant context.

| Questions                                                                                                                                                                | relevant              | Not                   | Somewhat              | Relevant              | Very                  | Comment  |
|--------------------------------------------------------------------------------------------------------------------------------------------------------------------------|-----------------------|-----------------------|-----------------------|-----------------------|-----------------------|----------|
|                                                                                                                                                                          | relevant              | relevant              | relevant              | relevant              | relevant              | (if any) |
| 1. SaaS application functionality can be expanded through the addition of extra services via external SaaS providers.                                                    | <input type="radio"/> | <input type="radio"/> | <input type="radio"/> | <input type="radio"/> | <input type="radio"/> |          |
| 2. Most SaaS service customers assume that the SaaS application will be easy to amalgamate with their existing in-house systems                                          | <input type="radio"/> | <input type="radio"/> | <input type="radio"/> | <input type="radio"/> | <input type="radio"/> |          |
| 3. The integration of SaaS applications with external systems related to non-functional elements, such as security controls, should be facilitated by SaaS architecture. | <input type="radio"/> | <input type="radio"/> | <input type="radio"/> | <input type="radio"/> | <input type="radio"/> |          |
| 4. Integration encompasses elements which safeguard an                                                                                                                   | <input type="radio"/> | <input type="radio"/> | <input type="radio"/> | <input type="radio"/> | <input type="radio"/> |          |

| Questions                                                                                                                                                                           | Not relevant          | Somewhat relevant     | Relevant              | Very relevant         | Comment (if any) |
|-------------------------------------------------------------------------------------------------------------------------------------------------------------------------------------|-----------------------|-----------------------|-----------------------|-----------------------|------------------|
| unbroken stream of integration at both design time and runtime.                                                                                                                     |                       |                       |                       |                       |                  |
| 5. Integration platforms incorporate both service frameworks, through which services can be assimilated, and process frameworks, through which business processes can be performed. | <input type="radio"/> | <input type="radio"/> | <input type="radio"/> | <input type="radio"/> |                  |
| 6. Additional services from third-party SaaS providers employ different programming languages running in different contexts.                                                        | <input type="radio"/> | <input type="radio"/> | <input type="radio"/> | <input type="radio"/> |                  |
| 7. Coding or scripting is utilized to incorporate services into applications.                                                                                                       | <input type="radio"/> | <input type="radio"/> | <input type="radio"/> | <input type="radio"/> |                  |
| 8. Incorporating services into applications requires configuration or setup.                                                                                                        | <input type="radio"/> | <input type="radio"/> | <input type="radio"/> | <input type="radio"/> |                  |
| 9. Synchronization toolkits and data retrieval mechanisms are created to respond to the demands posed by integration.                                                               | <input type="radio"/> | <input type="radio"/> | <input type="radio"/> | <input type="radio"/> |                  |

## SaaS Modification

**Modification** refers to techniques and solutions that alter the application design and other functional requirements of the application by way of alterations implemented on the source code.

Please indicate to what relevancy you feel these statements represent the **modification approach** in the SaaS Multi-Tenant context.

| Questions                                                                                                                    | Not relevant          | Somewhat relevant     | Relevant              | Very relevant         | Comment (if any) |
|------------------------------------------------------------------------------------------------------------------------------|-----------------------|-----------------------|-----------------------|-----------------------|------------------|
| 1. The generation of functionality requires source code modifications to be made as part of the customization process.       | <input type="radio"/> | <input type="radio"/> | <input type="radio"/> | <input type="radio"/> |                  |
| 2. Overseeing different incarnations of software codes necessitates the effective distribution of infrastructure and assets. | <input type="radio"/> | <input type="radio"/> | <input type="radio"/> | <input type="radio"/> |                  |
| 3. SaaS vendors must manage all elements of                                                                                  | <input type="radio"/> | <input type="radio"/> | <input type="radio"/> | <input type="radio"/> |                  |

| Questions                                                                                                                                                                                                       | relevant              | Not | Somewhat              | Relevant              | relevant | Very                  | Comment<br>(if any) |
|-----------------------------------------------------------------------------------------------------------------------------------------------------------------------------------------------------------------|-----------------------|-----|-----------------------|-----------------------|----------|-----------------------|---------------------|
| customization codes on an individual tenant basis.                                                                                                                                                              |                       |     |                       |                       |          |                       |                     |
| 4. SaaS vendors can alter application codes in cases where the definition of configuration and customization by large tenant groups justifies or requires this.                                                 | <input type="radio"/> |     | <input type="radio"/> | <input type="radio"/> |          | <input type="radio"/> |                     |
| 5. Code customization changes are implemented at the runtime of the SaaS application.                                                                                                                           | <input type="radio"/> |     | <input type="radio"/> | <input type="radio"/> |          | <input type="radio"/> |                     |
| 6. Runtime code changes have to consider the dependency relationship between different functions, whereby one function can depend on several functions yet can simultaneously be depended on by several others. | <input type="radio"/> |     | <input type="radio"/> | <input type="radio"/> |          | <input type="radio"/> |                     |
| 7. Namespaces, inheritance, and polymorphism are used to implement source code customizations.                                                                                                                  | <input type="radio"/> |     | <input type="radio"/> | <input type="radio"/> |          | <input type="radio"/> |                     |
| 8. Source code modifications are instituted by adding new methods or attributes, or by changing the object's current implementation methods.                                                                    | <input type="radio"/> |     | <input type="radio"/> | <input type="radio"/> |          | <input type="radio"/> |                     |
| 9. Source code modifications involve the deletion of custom objects, methods, or attributes.                                                                                                                    | <input type="radio"/> |     | <input type="radio"/> | <input type="radio"/> |          | <input type="radio"/> |                     |

### Part 3: SaaS Quality

Based on the definition provided for each quality attribute, please indicate to what relevancy you feel these statements represent the **quality attributes** of SaaS application that play an important role in customization.

| Questions                                                                                                                   | relevant              | Not | Somewhat              | Relevant              | relevant | Very                  | Comment<br>(if any) |
|-----------------------------------------------------------------------------------------------------------------------------|-----------------------|-----|-----------------------|-----------------------|----------|-----------------------|---------------------|
| 1. <b>Multi-tenancy:</b> SaaS services can support instances of simultaneous access by multiple users for multiple tenants. | <input type="radio"/> |     | <input type="radio"/> | <input type="radio"/> |          | <input type="radio"/> |                     |
| 2. <b>Scalability:</b> SaaS providers can manage growth or decline in the level of services.                                | <input type="radio"/> |     | <input type="radio"/> | <input type="radio"/> |          | <input type="radio"/> |                     |
| 3. <b>Availability:</b> SaaS services can function within a specific time to satisfy users' needs.                          | <input type="radio"/> |     | <input type="radio"/> | <input type="radio"/> |          | <input type="radio"/> |                     |
| 4. <b>Reliability:</b> SaaS services maintain operations and functioning without failure within a given time period.        | <input type="radio"/> |     | <input type="radio"/> | <input type="radio"/> |          | <input type="radio"/> |                     |

| Questions                                                                                                                            | relevant              | Not relevant          | Somewhat relevant     | Relevant              | Very relevant         | Comment (if any) |
|--------------------------------------------------------------------------------------------------------------------------------------|-----------------------|-----------------------|-----------------------|-----------------------|-----------------------|------------------|
| 5. <b>Maintainability:</b> SaaS providers can repair services to keep them in good working order.                                    | <input type="radio"/> | <input type="radio"/> | <input type="radio"/> | <input type="radio"/> | <input type="radio"/> |                  |
| 6. <b>Security:</b> SaaS providers control service data and access to the services.                                                  | <input type="radio"/> | <input type="radio"/> | <input type="radio"/> | <input type="radio"/> | <input type="radio"/> |                  |
| 7. <b>Usability:</b> A service can be perceived as useful and accessible by clients when used according to its intended application. | <input type="radio"/> | <input type="radio"/> | <input type="radio"/> | <input type="radio"/> | <input type="radio"/> |                  |
| 8. <b>Interoperability:</b> SaaS service can easily interact with other services.                                                    | <input type="radio"/> | <input type="radio"/> | <input type="radio"/> | <input type="radio"/> | <input type="radio"/> |                  |
| 9. <b>Efficiency:</b> SaaS services effectively utilize resources to perform their functions.                                        | <input type="radio"/> | <input type="radio"/> | <input type="radio"/> | <input type="radio"/> | <input type="radio"/> |                  |
| 10. <b>Functionality:</b> SaaS service features are extensive/inclusive.                                                             | <input type="radio"/> | <input type="radio"/> | <input type="radio"/> | <input type="radio"/> | <input type="radio"/> |                  |
| 11. <b>Accessibility:</b> The service is suitable for use by users with disabilities.                                                | <input type="radio"/> | <input type="radio"/> | <input type="radio"/> | <input type="radio"/> | <input type="radio"/> |                  |
| 12. <b>Commonality:</b> SaaS services possess common features and are amenable to reuse by multiple users.                           | <input type="radio"/> | <input type="radio"/> | <input type="radio"/> | <input type="radio"/> | <input type="radio"/> |                  |
| 13. <b>Response time:</b> There is defined time limit which is adhered to between a service request and a service response.          | <input type="radio"/> | <input type="radio"/> | <input type="radio"/> | <input type="radio"/> | <input type="radio"/> |                  |

## Comments and Suggestions

If there are any other statements, or further comments regarding the customization approaches or the quality attributes of SaaS applications that you think is needed and have not reflected in this survey, please add your remarks in the space provided below.

**Thank you for your time**

## Appendix B

### Content Validity Questionnaire (Round 2)

#### SaaS Personalization

**Personalization** refers to techniques and solutions that provide transparent customization initiated by the application without the need to inform the users.

Please indicate to what relevancy you feel these statements represent the **personalization** approach in the SaaS Multi-Tenant context.

| Questions                                                                                                                                                                                   | Not<br>relevant       | Somewhat<br>relevant  | Quite<br>Relevant     | Very<br>relevant      | Comment<br>(if any) |
|---------------------------------------------------------------------------------------------------------------------------------------------------------------------------------------------|-----------------------|-----------------------|-----------------------|-----------------------|---------------------|
| 1. Personalization involves gathering data sets correlating to individual tenant or group of tenants.                                                                                       | <input type="radio"/> | <input type="radio"/> | <input type="radio"/> | <input type="radio"/> |                     |
| 2. Personalization seeks to learn accurate services based on the tenant's current preferences, and other tenants' shared preferences                                                        | <input type="radio"/> | <input type="radio"/> | <input type="radio"/> | <input type="radio"/> |                     |
| 3. Personalization involves collecting data on tenant's activities and take advantage of other tenants behavioral activities                                                                | <input type="radio"/> | <input type="radio"/> | <input type="radio"/> | <input type="radio"/> |                     |
| 4. Personalization uses a set of potential services offered by pre-structured templates of multiple SaaS providers.                                                                         | <input type="radio"/> | <input type="radio"/> | <input type="radio"/> | <input type="radio"/> |                     |
| 5. Personalization within SaaS entails recommendation mechanism for proposing suitable services according to users' preferences, user profiles, data usage, and service directories.        | <input type="radio"/> | <input type="radio"/> | <input type="radio"/> | <input type="radio"/> |                     |
| 6. SaaS-based personalization considers the meaning (semantics) of data of tenants and tenants' community                                                                                   | <input type="radio"/> | <input type="radio"/> | <input type="radio"/> | <input type="radio"/> |                     |
| 7. SaaS-based personalization uses runtime behavior adaptation facilities that can creatively modify the behavior of SaaS applications in accordance with the context of their performance. | <input type="radio"/> | <input type="radio"/> | <input type="radio"/> | <input type="radio"/> |                     |
| 8. Information sources for SaaS-based personalization can originate from a tenant or tenant's communities.                                                                                  | <input type="radio"/> | <input type="radio"/> | <input type="radio"/> | <input type="radio"/> |                     |



## SaaS Configuration

**Configuration** refers to techniques and solutions that offer a pre-defined setting for the alteration of application functions within the pre-defined scope.

Please indicate to what relevancy you feel these statements represent the **configuration** approach in the SaaS Multi-Tenant context.

| Questions                                                                                                                                                                                               | relevant              | Not                   | Somewhat relevant     | Relevant              | Quite relevant        | Very relevant         | Comment (if any) |
|---------------------------------------------------------------------------------------------------------------------------------------------------------------------------------------------------------|-----------------------|-----------------------|-----------------------|-----------------------|-----------------------|-----------------------|------------------|
| 1. Configuration typically maintains diversity by establishing pre-defined parameters, options, and components, and treats each tenant individually.                                                    | <input type="radio"/> | <input type="radio"/> | <input type="radio"/> | <input type="radio"/> | <input type="radio"/> | <input type="radio"/> |                  |
| 2. Each tenant can configure the application in a standalone way by employing techniques to modify the functions of applications within established limits.                                             | <input type="radio"/> | <input type="radio"/> | <input type="radio"/> | <input type="radio"/> | <input type="radio"/> | <input type="radio"/> |                  |
| 3. SaaS providers have to develop and capture sets of services and plugins, from which tenants can make selections and perform configurations.                                                          | <input type="radio"/> | <input type="radio"/> | <input type="radio"/> | <input type="radio"/> | <input type="radio"/> | <input type="radio"/> |                  |
| 4. Tenants can create customization based on templates.                                                                                                                                                 | <input type="radio"/> | <input type="radio"/> | <input type="radio"/> | <input type="radio"/> | <input type="radio"/> | <input type="radio"/> |                  |
| 5. Tenants can select their desired workflow templates and items relating to SaaS application templates from the template repository.                                                                   | <input type="radio"/> | <input type="radio"/> | <input type="radio"/> | <input type="radio"/> | <input type="radio"/> | <input type="radio"/> |                  |
| 6. When a tenant wishes to subscribe to the SaaS application, the capabilities of each feature within the system are analyzed to determine whether they ought to be assimilated within the application. | <input type="radio"/> | <input type="radio"/> | <input type="radio"/> | <input type="radio"/> | <input type="radio"/> | <input type="radio"/> |                  |
| 7. All Configurations established by the tenants have to be within the context of the runtime of the application.                                                                                       | <input type="radio"/> | <input type="radio"/> | <input type="radio"/> | <input type="radio"/> | <input type="radio"/> | <input type="radio"/> |                  |
| 8. An option of disabling or excluding some features of the SaaS application should be provided with the isolation effect across the tenants.                                                           | <input type="radio"/> | <input type="radio"/> | <input type="radio"/> | <input type="radio"/> | <input type="radio"/> | <input type="radio"/> |                  |

## SaaS Composition

**Composition** refers to techniques and solutions that bring together a distinct collection of pre-defined application components that jointly amount to a custom solution.

Please indicate to what relevancy you feel these statements represent the **composition** approach in the SaaS Multi-Tenant context.

| Questions                                                                                                                                                                  | Very relevant         | Quite relevant        | Relevant              | Somewhat relevant     | Not relevant          | Comment (if any) |
|----------------------------------------------------------------------------------------------------------------------------------------------------------------------------|-----------------------|-----------------------|-----------------------|-----------------------|-----------------------|------------------|
| 1. The multiple interacting components of the SaaS application are consolidated, and new application components can be shared between multiple SaaS tenants and end users. | <input type="radio"/> | <input type="radio"/> | <input type="radio"/> | <input type="radio"/> | <input type="radio"/> |                  |
| 2. Composing different collaboration components is done according to the runtime of the SaaS application.                                                                  | <input type="radio"/> | <input type="radio"/> | <input type="radio"/> | <input type="radio"/> | <input type="radio"/> |                  |
| 3. The composition of components takes into account the subcomponents of the core one.                                                                                     | <input type="radio"/> | <input type="radio"/> | <input type="radio"/> | <input type="radio"/> | <input type="radio"/> |                  |
| 4. The composition approach supports the simplification of consolidated SaaS components.                                                                                   | <input type="radio"/> | <input type="radio"/> | <input type="radio"/> | <input type="radio"/> | <input type="radio"/> |                  |
| 5. Performing the composition of SaaS application components considers the relationships and dependencies between these components.                                        | <input type="radio"/> | <input type="radio"/> | <input type="radio"/> | <input type="radio"/> | <input type="radio"/> |                  |

### SaaS Extension

**Extension** refers to techniques and solutions that expand the functionality of the application by inserting the custom code in pre-defined places of application's code.

Please indicate to what relevancy you feel these statements represent the **extension** approach in the SaaS Multi-Tenant context.

| Questions                                                                                                                                           | Very relevant         | Quite relevant        | Relevant              | Somewhat relevant     | Not relevant          | Comment (if any) |
|-----------------------------------------------------------------------------------------------------------------------------------------------------|-----------------------|-----------------------|-----------------------|-----------------------|-----------------------|------------------|
| 1. The SaaS application is extended by adding custom code to extend the application through custom functionality.                                   | <input type="radio"/> | <input type="radio"/> | <input type="radio"/> | <input type="radio"/> | <input type="radio"/> |                  |
| 2. The SaaS application provides a set of extension points which permit a customized service to be plugged in at virtual points in the application. | <input type="radio"/> | <input type="radio"/> | <input type="radio"/> | <input type="radio"/> | <input type="radio"/> |                  |
| 3. Injecting custom code into SaaS application has to be                                                                                            | <input type="radio"/> | <input type="radio"/> | <input type="radio"/> | <input type="radio"/> | <input type="radio"/> |                  |

| Questions                                                                                                                                      | Very relevant         | Quite Relevant        | Somewhat relevant     | Not relevant          | Comment (if any) |
|------------------------------------------------------------------------------------------------------------------------------------------------|-----------------------|-----------------------|-----------------------|-----------------------|------------------|
| supported at the run time of the application.                                                                                                  |                       |                       |                       |                       |                  |
| 4. The SaaS service provider supplies an open platform and an API, which allows developers to inject custom codes into business object layers. | <input type="radio"/> | <input type="radio"/> | <input type="radio"/> | <input type="radio"/> |                  |
| 5. These injected codes can either be replacements for existing objects or extensions to them.                                                 | <input type="radio"/> | <input type="radio"/> | <input type="radio"/> | <input type="radio"/> |                  |
| 6. An extension may be private to an individual tenant or shared by multiple tenants.                                                          | <input type="radio"/> | <input type="radio"/> | <input type="radio"/> | <input type="radio"/> |                  |

### SaaS Integration

**Integration** refers to techniques and solutions that implement third-party components designed to work with the application.

Please indicate to what relevancy you feel these statements represent the **integration** approach in the SaaS Multi-Tenant context.

| Questions                                                                                                                                                                        | Very relevant         | Quite Relevant        | Somewhat relevant     | Not relevant          | Comment (if any) |
|----------------------------------------------------------------------------------------------------------------------------------------------------------------------------------|-----------------------|-----------------------|-----------------------|-----------------------|------------------|
| 1. SaaS application functionality can be expanded through the addition of extra services via external SaaS providers.                                                            | <input type="radio"/> | <input type="radio"/> | <input type="radio"/> | <input type="radio"/> |                  |
| 2. SaaS service customers assume that the SaaS application will be easy to amalgamate with their existing in-house systems                                                       | <input type="radio"/> | <input type="radio"/> | <input type="radio"/> | <input type="radio"/> |                  |
| 3. The integration of SaaS applications with external systems related to non-functional elements, such as security controls, should be facilitated by SaaS architecture.         | <input type="radio"/> | <input type="radio"/> | <input type="radio"/> | <input type="radio"/> |                  |
| 4. Integration encompasses aspects which ensure a smooth flow at both design time and runtime.                                                                                   | <input type="radio"/> | <input type="radio"/> | <input type="radio"/> | <input type="radio"/> |                  |
| 5. Integration platforms incorporate both service framework, through which services can be assimilated, and process framework, through which business processes can be executed. | <input type="radio"/> | <input type="radio"/> | <input type="radio"/> | <input type="radio"/> |                  |



| Questions                                                                                                                                                                                                                           | Very relevant         | Quite Relevant        | Somewhat relevant     | Not relevant          | Comment (if any) |
|-------------------------------------------------------------------------------------------------------------------------------------------------------------------------------------------------------------------------------------|-----------------------|-----------------------|-----------------------|-----------------------|------------------|
| tenant.                                                                                                                                                                                                                             |                       |                       |                       |                       |                  |
| 4. SaaS vendors alter application codes when identical customizations are defined and justified by a considerable number of tenants.                                                                                                | <input type="radio"/> | <input type="radio"/> | <input type="radio"/> | <input type="radio"/> |                  |
| 5. Code customization changes are implemented at the runtime of the SaaS application.                                                                                                                                               | <input type="radio"/> | <input type="radio"/> | <input type="radio"/> | <input type="radio"/> |                  |
| 6. Runtime code changes have to consider the dependency relationship between different functions, whereby one function of SaaS application can depend on several functions yet can simultaneously be depended on by several others. | <input type="radio"/> | <input type="radio"/> | <input type="radio"/> | <input type="radio"/> |                  |
| 7. Source code modifications are made by adding/deleting methods or attributes, or by changing the object's current implementation methods.                                                                                         | <input type="radio"/> | <input type="radio"/> | <input type="radio"/> | <input type="radio"/> |                  |

### Part 3: SaaS Quality

Based on the definition provided for each quality attribute, please indicate to what relevancy you feel these statements represent the **quality attributes** of SaaS application that play an important role in SaaS customization.

| Questions                                                                                                                                      | Very relevant         | Quite Relevant        | Somewhat relevant     | Not relevant          | Comment (if any) |
|------------------------------------------------------------------------------------------------------------------------------------------------|-----------------------|-----------------------|-----------------------|-----------------------|------------------|
| 1. <b>Multi-tenancy:</b> SaaS services can support instances of simultaneous access by multiple users for multiple tenants.                    | <input type="radio"/> | <input type="radio"/> | <input type="radio"/> | <input type="radio"/> |                  |
| 2. <b>Scalability:</b> SaaS providers can manage growth or decline in the level of services.                                                   | <input type="radio"/> | <input type="radio"/> | <input type="radio"/> | <input type="radio"/> |                  |
| 3. <b>Availability:</b> SaaS services can function within a specific time to satisfy users' needs.                                             | <input type="radio"/> | <input type="radio"/> | <input type="radio"/> | <input type="radio"/> |                  |
| 4. <b>Reliability:</b> SaaS application maintains operating and functioning under given conditions without failure within a given time period. | <input type="radio"/> | <input type="radio"/> | <input type="radio"/> | <input type="radio"/> |                  |

| Questions                                                                                                                                                               | relevant              | Not                   | Somewhat              | Relevant              | Quite                 | relevant              | Very                  | Comment<br>(if any) |
|-------------------------------------------------------------------------------------------------------------------------------------------------------------------------|-----------------------|-----------------------|-----------------------|-----------------------|-----------------------|-----------------------|-----------------------|---------------------|
| 5. <b>Maintainability:</b> Modifications to the application are made by SaaS provider to retain it in the condition of good repair.                                     | <input type="radio"/> | <input type="radio"/> | <input type="radio"/> | <input type="radio"/> | <input type="radio"/> | <input type="radio"/> | <input type="radio"/> |                     |
| 6. <b>Security:</b> the effectiveness of SaaS provider's controls on service data, access to the services, and the physical facilities from which service are provided. | <input type="radio"/> | <input type="radio"/> | <input type="radio"/> | <input type="radio"/> | <input type="radio"/> | <input type="radio"/> | <input type="radio"/> |                     |
| 7. <b>Usability:</b> the ease with which SaaS application can be used to achieve tenant-specific-goal.                                                                  | <input type="radio"/> | <input type="radio"/> | <input type="radio"/> | <input type="radio"/> | <input type="radio"/> | <input type="radio"/> | <input type="radio"/> |                     |
| 8. <b>Interoperability:</b> SaaS service can easily interact with other services from the same SaaS provider or other providers.                                        | <input type="radio"/> | <input type="radio"/> | <input type="radio"/> | <input type="radio"/> | <input type="radio"/> | <input type="radio"/> | <input type="radio"/> |                     |
| 9. <b>Efficiency:</b> SaaS services effectively utilize resources to perform their functions.                                                                           | <input type="radio"/> | <input type="radio"/> | <input type="radio"/> | <input type="radio"/> | <input type="radio"/> | <input type="radio"/> | <input type="radio"/> |                     |
| 10. <b>Functionality:</b> SaaS application provides an extensive set of features.                                                                                       | <input type="radio"/> | <input type="radio"/> | <input type="radio"/> | <input type="radio"/> | <input type="radio"/> | <input type="radio"/> | <input type="radio"/> |                     |
| 11. <b>Accessibility:</b> SaaS services are operable by users with different disabilities.                                                                              | <input type="radio"/> | <input type="radio"/> | <input type="radio"/> | <input type="radio"/> | <input type="radio"/> | <input type="radio"/> | <input type="radio"/> |                     |
| 12. <b>Commonality:</b> SaaS services possess common features and are amenable to reuse by multiple users.                                                              | <input type="radio"/> | <input type="radio"/> | <input type="radio"/> | <input type="radio"/> | <input type="radio"/> | <input type="radio"/> | <input type="radio"/> |                     |
| 13. <b>Response time:</b> SaaS application adheres to a defined time limit between service request and service response.                                                | <input type="radio"/> | <input type="radio"/> | <input type="radio"/> | <input type="radio"/> | <input type="radio"/> | <input type="radio"/> | <input type="radio"/> |                     |

### Comments and Suggestions

If there are any other statements, or further comments regarding the customization approaches or the quality attributes of SaaS applications that you think is needed and have not reflected in this survey, please add your remarks in the space provided below.

## Appendix C

### Reliability Questionnaire (Round 3)

#### Part 1: Demographics

Please mark your response for each of the following questions:

1- What is your gender?

- Male  
 Female  
 Other

2- Which age range describes you best?

- 21-30  
 31-40  
 Over 40

3- Are you familiar with SaaS (Software as a Service) in Cloud Computing?

- Yes  
 No  
 Somewhat

4- which SaaS applications are you familiar?

- Google maps and apps (mails, docs, and drive)  
 Microsoft Office 365  
 Salesforce CRM application  
 And others

5- How many years' experience do you possess in the following areas?

|                                    | None                  | 1-2                   | 3-4                   | >4                    |
|------------------------------------|-----------------------|-----------------------|-----------------------|-----------------------|
| Software engineering               | <input type="radio"/> | <input type="radio"/> | <input type="radio"/> | <input type="radio"/> |
| Software development               | <input type="radio"/> | <input type="radio"/> | <input type="radio"/> | <input type="radio"/> |
| Software quality                   | <input type="radio"/> | <input type="radio"/> | <input type="radio"/> | <input type="radio"/> |
| Software maintenance and operation | <input type="radio"/> | <input type="radio"/> | <input type="radio"/> | <input type="radio"/> |
| Software customization             | <input type="radio"/> | <input type="radio"/> | <input type="radio"/> | <input type="radio"/> |
| Multi-Tenant SaaS                  | <input type="radio"/> | <input type="radio"/> | <input type="radio"/> | <input type="radio"/> |

## Part 2: SaaS Customization Approaches

The following statements describe the different customization approaches that may impact the quality of SaaS applications. The scales below represent opinions of equivalent weight and strength. You should select the responses which most closely correspond to your views. For each question, you must choose one scale ONLY.

### SaaS Configuration

**Configuration** refers to techniques and solutions that offer a pre-defined setting for the alteration of application functions within the pre-defined scope.

Please indicate the extent to which, in your view, the following statements represent the **configuration** approach in the SaaS Multi-Tenant context.

| Questions                                                                                                                                                                                               | Strongly Disagree     | Disagree              | Neither Nor           | Agree                 | Strongly agree        |
|---------------------------------------------------------------------------------------------------------------------------------------------------------------------------------------------------------|-----------------------|-----------------------|-----------------------|-----------------------|-----------------------|
| 1. Configuration typically maintains diversity by establishing pre-defined parameters, options, and components, and treats each tenant individually.                                                    | <input type="radio"/> | <input type="radio"/> | <input type="radio"/> | <input type="radio"/> | <input type="radio"/> |
| 2. Each tenant can configure the application in a standalone way by employing techniques to modify the functions of applications within established limits.                                             | <input type="radio"/> | <input type="radio"/> | <input type="radio"/> | <input type="radio"/> | <input type="radio"/> |
| 3. SaaS providers have to develop and capture sets of services and plugins, from which tenants can make selections and perform configurations.                                                          | <input type="radio"/> | <input type="radio"/> | <input type="radio"/> | <input type="radio"/> | <input type="radio"/> |
| 4. Tenants can create customization based on templates.                                                                                                                                                 | <input type="radio"/> | <input type="radio"/> | <input type="radio"/> | <input type="radio"/> | <input type="radio"/> |
| 5. Tenants can select their desired workflow templates and items relating to SaaS application templates from the template repository.                                                                   | <input type="radio"/> | <input type="radio"/> | <input type="radio"/> | <input type="radio"/> | <input type="radio"/> |
| 6. When a tenant wishes to subscribe to the SaaS application, the capabilities of each feature within the system are analyzed to determine whether they ought to be assimilated within the application. | <input type="radio"/> | <input type="radio"/> | <input type="radio"/> | <input type="radio"/> | <input type="radio"/> |
| 7. All Configurations established by the tenants have to be within the context of the runtime of the application.                                                                                       | <input type="radio"/> | <input type="radio"/> | <input type="radio"/> | <input type="radio"/> | <input type="radio"/> |
| 8. An option of disabling or excluding some features of the SaaS application should be provided with the isolation effect across the tenants.                                                           | <input type="radio"/> | <input type="radio"/> | <input type="radio"/> | <input type="radio"/> | <input type="radio"/> |



### SaaS Composition

**Composition** refers to techniques and solutions that bring together a distinct collection of pre-defined application components that jointly amount to a custom solution.

Please indicate the extent to which you feel the following statements represent the **composition** approach in the SaaS Multi-Tenant context.

| Questions                                                                                                                                                                  | Strongly Disagree     | Disagree              | Neither Nor           | Agree                 | Strongly agree        |
|----------------------------------------------------------------------------------------------------------------------------------------------------------------------------|-----------------------|-----------------------|-----------------------|-----------------------|-----------------------|
| 1. The multiple interacting components of the SaaS application are consolidated, and new application components can be shared between multiple SaaS tenants and end users. | <input type="radio"/> | <input type="radio"/> | <input type="radio"/> | <input type="radio"/> | <input type="radio"/> |
| 2. Composing different collaboration components is done according to the runtime of the SaaS application.                                                                  | <input type="radio"/> | <input type="radio"/> | <input type="radio"/> | <input type="radio"/> | <input type="radio"/> |
| 3. The composition of components takes into account the subcomponents of the core one.                                                                                     | <input type="radio"/> | <input type="radio"/> | <input type="radio"/> | <input type="radio"/> | <input type="radio"/> |
| 4. Performing the composition of SaaS application components considers the relationships and dependencies between these components.                                        | <input type="radio"/> | <input type="radio"/> | <input type="radio"/> | <input type="radio"/> | <input type="radio"/> |

### SaaS Extension

**Extension** refers to techniques and solutions that expand the functionality of the application by inserting the custom code in pre-defined places of application's code.

Please indicate the extent to which, in your view, you feel the following statements represent the **extension** approach in the SaaS Multi-Tenant context.

| Questions                                                                                                                                           | Strongly Disagree     | Disagree              | Neither Nor           | Agree                 | Strongly agree        |
|-----------------------------------------------------------------------------------------------------------------------------------------------------|-----------------------|-----------------------|-----------------------|-----------------------|-----------------------|
| 1. The SaaS application is extended by adding custom code to extend the application through custom functionality.                                   | <input type="radio"/> | <input type="radio"/> | <input type="radio"/> | <input type="radio"/> | <input type="radio"/> |
| 2. The SaaS application provides a set of extension points which permit a customized service to be plugged in at virtual points in the application. | <input type="radio"/> | <input type="radio"/> | <input type="radio"/> | <input type="radio"/> | <input type="radio"/> |
| 3. Injecting custom code into SaaS application has to be supported at the run time of the application.                                              | <input type="radio"/> | <input type="radio"/> | <input type="radio"/> | <input type="radio"/> | <input type="radio"/> |

| Questions                                                                                                                                      | Strongly agree        | Agree                 | Neither Nor           | Disagree              | Strongly Disagree     |
|------------------------------------------------------------------------------------------------------------------------------------------------|-----------------------|-----------------------|-----------------------|-----------------------|-----------------------|
| 4. The SaaS service provider supplies an open platform and an API, which allows developers to inject custom codes into business object layers. | <input type="radio"/> | <input type="radio"/> | <input type="radio"/> | <input type="radio"/> | <input type="radio"/> |
| 5. These injected codes can either be replacements for existing objects or extensions to them.                                                 | <input type="radio"/> | <input type="radio"/> | <input type="radio"/> | <input type="radio"/> | <input type="radio"/> |
| 6. An extension may be private to an individual tenant or shared by multiple tenants.                                                          | <input type="radio"/> | <input type="radio"/> | <input type="radio"/> | <input type="radio"/> | <input type="radio"/> |

### SaaS Integration

**Integration** refers to techniques and solutions that implement third-party components designed to work with the application.

Please indicate the extent to which you feel the following statements represent the **integration** approach in SaaS Multi-Tenant context.

| Questions                                                                                                                                                                        | Strongly agree        | Agree                 | Neither Nor           | Disagree              | Strongly Disagree     |
|----------------------------------------------------------------------------------------------------------------------------------------------------------------------------------|-----------------------|-----------------------|-----------------------|-----------------------|-----------------------|
| 1. SaaS application functionality can be expanded through the addition of extra services via external SaaS providers.                                                            | <input type="radio"/> | <input type="radio"/> | <input type="radio"/> | <input type="radio"/> | <input type="radio"/> |
| 2. SaaS service customers assume that the SaaS application will be easy to amalgamate with their existing in-house systems                                                       | <input type="radio"/> | <input type="radio"/> | <input type="radio"/> | <input type="radio"/> | <input type="radio"/> |
| 3. The integration of SaaS applications with external systems related to non-functional elements, such as security controls, should be facilitated by SaaS architecture.         | <input type="radio"/> | <input type="radio"/> | <input type="radio"/> | <input type="radio"/> | <input type="radio"/> |
| 4. Integration encompasses aspects which ensure a smooth flow at both design time and runtime.                                                                                   | <input type="radio"/> | <input type="radio"/> | <input type="radio"/> | <input type="radio"/> | <input type="radio"/> |
| 5. Integration platforms incorporate both service framework, through which services can be assimilated, and process framework, through which business processes can be executed. | <input type="radio"/> | <input type="radio"/> | <input type="radio"/> | <input type="radio"/> | <input type="radio"/> |
| 6. Additional services from third-party SaaS providers employ different programming languages running in different environments.                                                 | <input type="radio"/> | <input type="radio"/> | <input type="radio"/> | <input type="radio"/> | <input type="radio"/> |
| 7. Coding or scripting is utilized to incorporate external                                                                                                                       | <input type="radio"/> | <input type="radio"/> | <input type="radio"/> | <input type="radio"/> | <input type="radio"/> |

| Questions                                                                                                                | Strongly<br>agree     | Agree                 | Neither<br>Nor        | Disagree              | Strongly<br>Disagree  |
|--------------------------------------------------------------------------------------------------------------------------|-----------------------|-----------------------|-----------------------|-----------------------|-----------------------|
| services into SaaS application.                                                                                          |                       |                       |                       |                       |                       |
| 8. Incorporating services into SaaS application requires an integration interface in the form of configuration or setup. | <input type="radio"/> | <input type="radio"/> | <input type="radio"/> | <input type="radio"/> | <input type="radio"/> |
| 9. Synchronization toolkits and data retrieval mechanisms are created to respond to the demands posed by integration.    | <input type="radio"/> | <input type="radio"/> | <input type="radio"/> | <input type="radio"/> | <input type="radio"/> |

### SaaS Modification

**Modification** refers to techniques and solutions that alter the application design and other functional requirements of the application by means of alterations implemented to the source code.

Please indicate the extent to which you feel the following statements represent the **modification approach** in the SaaS Multi-Tenant context.

| Questions                                                                                                                                                                                        | Strongly<br>agree     | Agree                 | Neither<br>Nor        | Disagree              | Strongly<br>Disagree  |
|--------------------------------------------------------------------------------------------------------------------------------------------------------------------------------------------------|-----------------------|-----------------------|-----------------------|-----------------------|-----------------------|
| 1. Source code modifications are made to SaaS application to generate a new functionality without changing a shared code base.                                                                   | <input type="radio"/> | <input type="radio"/> | <input type="radio"/> | <input type="radio"/> | <input type="radio"/> |
| 2. The code modification must take resources allocation for customized code into account, ensuring operational cost-efficiency in terms of maintenance costs and resource sharing among tenants. | <input type="radio"/> | <input type="radio"/> | <input type="radio"/> | <input type="radio"/> | <input type="radio"/> |
| 3. SaaS vendors must manage all elements of customization codes on an individual tenant basis without developing many software versions for each tenant.                                         | <input type="radio"/> | <input type="radio"/> | <input type="radio"/> | <input type="radio"/> | <input type="radio"/> |
| 4. SaaS vendors alter application codes when identical customizations are defined and justified by a considerable number of tenants.                                                             | <input type="radio"/> | <input type="radio"/> | <input type="radio"/> | <input type="radio"/> | <input type="radio"/> |
| 5. Source code modifications are made by adding/deleting methods or attributes, or by changing the object's current implementation methods.                                                      | <input type="radio"/> | <input type="radio"/> | <input type="radio"/> | <input type="radio"/> | <input type="radio"/> |

### Part 3: SaaS Quality

Based on the definition provided for each quality attribute, please indicate the extent to which you feel each quality attribute plays an important role in customization.

| Questions                                                                                                                                                               | Strongly Disagree     | Disagree              | Neither Nor           | Agree                 | Strongly agree        |
|-------------------------------------------------------------------------------------------------------------------------------------------------------------------------|-----------------------|-----------------------|-----------------------|-----------------------|-----------------------|
| 1. <b>Multi-tenancy:</b> SaaS services can support instances of simultaneous access by multiple users for multiple tenants.                                             | <input type="radio"/> | <input type="radio"/> | <input type="radio"/> | <input type="radio"/> | <input type="radio"/> |
| 2. <b>Scalability:</b> SaaS providers can manage growth or decline in the level of services.                                                                            | <input type="radio"/> | <input type="radio"/> | <input type="radio"/> | <input type="radio"/> | <input type="radio"/> |
| 3. <b>Availability:</b> SaaS services can function within a specific time to satisfy users' needs.                                                                      | <input type="radio"/> | <input type="radio"/> | <input type="radio"/> | <input type="radio"/> | <input type="radio"/> |
| 4. <b>Reliability:</b> SaaS application maintains operating and functioning under given conditions without failure within a given time period.                          | <input type="radio"/> | <input type="radio"/> | <input type="radio"/> | <input type="radio"/> | <input type="radio"/> |
| 5. <b>Maintainability:</b> Modifications to the application are made by SaaS provider to retain it in the condition of good repair.                                     | <input type="radio"/> | <input type="radio"/> | <input type="radio"/> | <input type="radio"/> | <input type="radio"/> |
| 6. <b>Security:</b> the effectiveness of SaaS provider's controls on service data, access to the services, and the physical facilities from which service are provided. | <input type="radio"/> | <input type="radio"/> | <input type="radio"/> | <input type="radio"/> | <input type="radio"/> |
| 7. <b>Usability:</b> the ease with which SaaS application can be used to achieve tenant-specific-goal.                                                                  | <input type="radio"/> | <input type="radio"/> | <input type="radio"/> | <input type="radio"/> | <input type="radio"/> |
| 8. <b>Interoperability:</b> SaaS service can easily interact with other services from the same SaaS provider or other providers.                                        | <input type="radio"/> | <input type="radio"/> | <input type="radio"/> | <input type="radio"/> | <input type="radio"/> |
| 9. <b>Efficiency:</b> SaaS services effectively utilize resources to perform their functions.                                                                           | <input type="radio"/> | <input type="radio"/> | <input type="radio"/> | <input type="radio"/> | <input type="radio"/> |
| 10. <b>Functionality:</b> SaaS application provides an extensive set of features.                                                                                       | <input type="radio"/> | <input type="radio"/> | <input type="radio"/> | <input type="radio"/> | <input type="radio"/> |
| 11. <b>Accessibility:</b> SaaS services are operable by users with different disabilities.                                                                              | <input type="radio"/> | <input type="radio"/> | <input type="radio"/> | <input type="radio"/> | <input type="radio"/> |
| 12. <b>Commonality:</b> SaaS services possess common features and are amenable to reuse by multiple users.                                                              | <input type="radio"/> | <input type="radio"/> | <input type="radio"/> | <input type="radio"/> | <input type="radio"/> |
| 13. <b>Response time:</b> SaaS application adheres to a defined time limit between service request and service response.                                                | <input type="radio"/> | <input type="radio"/> | <input type="radio"/> | <input type="radio"/> | <input type="radio"/> |

Thank you for your time
