# Supplementary material for: Development of a valid and reliable software customization model for SaaS quality through iterative method: perspectives from academia
Source: PeerJ Comput Sci. 2020 Sep 21;6:e294. doi: 10.7717/peerj-cs.294 (PMC7924678; doi:10.7717/peerj-cs.294)
Supplement: Supplemental Information 2 [file peerj-cs-06-294-s002.xlsx]

## Sheet: Personalization 
Calculation of I-CVI, S-CVI and Kappa for items of Personalization construct in round 1
Items_Id	Expert 1	Expert 2	Expert 3	Expert 4	Expert 5	Number of Agreement	I-CVI	Pc	Kappa
Per 1	2	4	2	2	3	2	0.4	0.3125	0.127273
Per 2	2	4	3	4	3	4	0.8	0.15625	0.762963
Per 3	2	4	3	3	3	4	0.8	0.15625	0.762963
Per 4	2	4	4	4	3	4	0.8	0.15625	0.762963
Per 5	2	4	3	4	3	4	0.8	0.15625	0.762963
Per 6	2	4	4	4	3	4	0.8	0.15625	0.762963
Per 7	4	4	4	3	3	5	1	0.03125	1
Per 8	4	4	3	3	3	5	1	0.03125	1
S-CVI/Ave	0.8
Total Agreement	2
S-CVI/UA	0.25

## Sheet: Configuration
Calculation of I-CVI, S-CVI and Kappa for items of Configuration construct in round 1
Items Id	Expert 1	Expert 2	Expert 3	Expert 4	Expert 5	Number of Agreement	I-CVI	Pc	Kappa
Con 1	2	4	2	2	3	2	0.4	0.3125	0.127273
Con 2	2	4	4	3	3	4	0.8	0.15625	0.762963
Con 3	4	4	4	3	3	5	1	0.03125	1
Con 4	4	4	3	4	3	5	1	0.03125	1
Con 5	4	4	3	4	3	5	1	0.03125	1
Con 6	2	4	3	4	3	4	0.8	0.15625	0.762963
Con 7	3	4	2	3	3	4	0.8	0.15625	0.762963
Con 8	2	4	3	4	3	4	0.8	0.15625	0.762963
Con 9	2	4	3	2	3	3	0.6	0.3125	0.418182
S-CVI/Ave	0.8
Total Agreement	3
S-CVI/UA	0.333333

## Sheet: Composition
Calculation of I-CVI, S-CVI and Kappa for items of Composition construct in round 1
Items Id	Expert 1	Expert 2	Expert 3	Expert 4	Expert 5	Number of Agreement	I-CVI	Pc	Kappa
Com 1	4	4	4	3	3	5	1	0.03125	1
Com 2	4	4	3	3	4	5	1	0.03125	1
Com 3	2	4	3	4	3	4	0.8	0.15625	0.762963
Com 4	2	4	2	1	3	2	0.4	0.3125	0.127273
Com 5	4	4	4	4	4	5	1	0.03125	1
S-CVI/Ave	0.84
Total Agreement	3
S-CVI/UA	0.6

## Sheet: Extension
Calculation of I-CVI, S-CVI and Kappa for items of Extension construct in round 1
Items Id	Expert 1	Expert 2	Expert 3	Expert 4	Expert 5	Number of Agreement	I-CVI	Pc	Kappa
Ext 1	4	4	4	3	3	5	1	0.03125	1
Ext 2	4	4	4	4	3	5	1	0.03125	1
Ext 3	2	4	3	2	3	3	0.6	0.3125	0.418182
Ext 4	4	4	4	4	4	5	1	0.03125	1
Ext 5	2	4	3	4	3	4	0.8	0.15625	0.762963
Ext 6	4	4	3	4	3	5	1	0.03125	1
S-CVI/Ave	0.9
Total Agreement	4
S-CVI/UA	0.666667

## Sheet: Integration 
Calculation of I-CVI, S-CVI and Kappa for items of Integration construct in round 1
Items Id	Expert 1	Expert 2	Expert 3	Expert 4	Expert 5	Number of Agreement	I-CVI	Pc	Kappa
Int 1	4	4	4	3	4	5	1	0.03125	1
Int 2	4	3	3	4	3	5	1	0.03125	1
Int 3	4	4	4	4	3	5	1	0.03125	1
Int 4	4	4	2	2	3	3	0.6	0.3125	0.418182
Int 5	4	4	3	2	4	4	0.8	0.15625	0.762963
Int 6	2	4	2	2	3	2	0.4	0.3125	0.127273
Int 7	4	4	2	2	3	3	0.6	0.3125	0.418182
Int 8	1	4	3		3	3	0.6	0.3125	0.418182
Int 9	4	4	2	3	3	4	0.8	0.15625	0.762963
S-CVI/Ave	0.755556
Total Agreement	3
S-CVI/UA	0.333333

## Sheet: Modification 
Calculation of I-CVI, S-CVI and Kappa for items of Modification construct in round 1
Items Id	Expert 1	Expert 2	Expert 3	Expert 4	Expert 5	Number of Agreement	I-CVI	Pc	Kappa
Mod 1	4	4	3	2	3	4	0.8	0.15625	0.762963
Mod 2	1	4	3	1	3	3	0.6	0.3125	0.418182
Mod 3	3	4	3	2	3	4	0.8	0.15625	0.762963
Mod 4	4	4	2	3	3	4	0.8	0.15625	0.762963
Mod 5	4	4	2	3	3	4	0.8	0.15625	0.762963
Mod 6	2	4	3	4	3	4	0.8	0.15625	0.762963
Mod 7	3	4	2	1	3	3	0.6	0.3125	0.418182
Mod 8	3	4	3	3	3	5	1	0.03125	1
Mod 9	3	4	2	3	3	4	0.8	0.15625	0.762963
S-CVI/Ave	0.777778
Total Agreement	1
S-CVI/UA	0.111111

## Sheet: SaaS Quality
Calculation of I-CVI, S-CVI and Kappa for items of SaaS Quality construct in round 1
Items Id	Expert 1	Expert 2	Expert 3	Expert 4	Expert 5	Number of Agreement	I-CVI	Pc	Kappa
QA 1	4	4	3	4	3	5	1	0.03125	1
QA 2	4	4	4	4	3	5	1	0.03125	1
QA 3	4	4	3	4	3	5	1	0.03125	1
QA 4	2	4	4	4	3	4	0.8	0.15625	0.762963
QA 5	2	4	4	2	3	3	0.6	0.3125	0.418182
QA 6	2	4	3	2	3	3	0.6	0.3125	0.418182
QA 7	2	4	2	3	3	3	0.6	0.3125	0.418182
QA 8	2	4	4	4	3	4	0.8	0.15625	0.762963
QA 9	4	4	2	3	3	4	0.8	0.15625	0.762963
QA 10		4	4	3	3	4	0.8	0.15625	0.762963
QA 11	2	4	1	3	3	3	0.6	0.3125	0.418182
QA 12	4	4	2	4	3	4	0.8	0.15625	0.762963
QA 13	2	4	2	4	3	3	0.6	0.3125	0.418182
S-CVI/Ave	0.769231
Total Agreement	3
S-CVI/UA	0.230769
