# Supplementary material for: Development of a valid and reliable software customization model for SaaS quality through iterative method: perspectives from academia
Source: PeerJ Comput Sci. 2020 Sep 21;6:e294. doi: 10.7717/peerj-cs.294 (PMC7924678; doi:10.7717/peerj-cs.294)
Supplement: Supplemental Information 3 [file peerj-cs-06-294-s003.xlsx]

## Sheet: Personalization 
Calculation of I-CVI, S-CVI and Kappa for items of Personalization construct in round 2
Items Id	Expert 1	Expert 2	Expert 3	Expert 4	Expert 5	Expert 6	Number of Agreement	I-CVI	Pc	Kappa
Per 1	4	1	3	2	3	4	4	0.666667	0.234375	0.564626
Per 2	4	3	3	4	3	3	6	1	0.015625	1
Per 3	3	2	2	2	3	3	3	0.5	0.3125	0.272727
Per 4	4	2	4	2	4	4	4	0.666667	0.234375	0.564626
Per 5	4	3	2	2	4	3	4	0.666667	0.234375	0.564626
Per 6	2	1	3	3	4	3	4	0.666667	0.234375	0.564626
Per 7	3	1	3	4	3	3	5	0.833333	0.09375	0.816092
Per 8	3	1	3	3	3	3	5	0.833333	0.09375	0.816092
S-CVI/Ave	0.729167
Total Agreement	1
S-CVI/UA	0.125

## Sheet: Configuration
Calculation of I-CVI, S-CVI and Kappa for items of Configuration construct in round 2
Items Id	Expert 1	Expert 2	Expert 3	Expert 4	Expert 5	Expert 6	Number of Agreement	I-CVI	Pc	Kappa
Con 1	4	3	3	3	4	4	6	1	0.015625	1
Con 2	3	4	4	4	3	4	6	1	0.015625	1
Con 3	4	4	3	4	4	3	6	1	0.015625	1
Con 4	3	4	4	4	3	4	6	1	0.015625	1
Con 5	4	2	3	4	3	3	5	0.833333	0.09375	0.816092
Con 6	2	3	4	3	3	3	5	0.833333	0.09375	0.816092
Con 7	3	3	3	3	3	3	6	1	0.015625	1
Con 8	4	4	3	4	4	4	6	1	0.015625	1
S-CVI/Ave	0.958333
Total Agreement	6
S-CVI/UA	0.75

## Sheet: Composition
Calculation of I-CVI, S-CVI and Kappa for items of Composition construct in round 2
Items Id	Expert 1	Expert 2	Expert 3	Expert 4	Expert 5	Expert 6	Number of Agreement	I-CVI	Pc	Kappa
Com 1	3	4	3	3	3	3	6	1	0.015625	1
Com 2	3	4	3	1	3	3	5	0.833333	0.09375	0.816092
Com 3	4	4	3	3	3	3	6	1	0.015625	1
Com 4	2	1	2	4	3	3	3	0.5	0.3125	0.272727
Com 5	3	4	3	4	4	4	6	1	0.015625	1
S-CVI/Ave	0.866667
Total Agreement	3
S-CVI/UA	0.6

## Sheet: Extension
Calculation of I-CVI, S-CVI and Kappa for items of Extension construct in round 2
Items Id	Expert 1	Expert 2	Expert 3	Expert 4	Expert 5	Expert 6	Number of Agreement	I-CVI	Pc	Kappa
Ext 1	3	3	3	3	3	3	6	1	0.015625	1
Ext 2	4	1	4	3	3	3	5	0.833333	0.09375	0.816092
Ext 3	3	1	3	4	3	3	5	0.833333	0.09375	0.816092
Ext 4	3	3	3	4	4	4	6	1	0.015625	1
Ext 5	4	3	4	4	4	4	6	1	0.015625	1
Ext 6	3	3	3	1	4	3	5	0.833333	0.09375	0.816092
S-CVI/Ave	0.916667
Total Agreement	3
S-CVI/UA	0.5

## Sheet: Integration 
Calculation of I-CVI, S-CVI and Kappa for items of Integration construct in round 2
Items Id	Expert 1	Expert 2	Expert 3	Expert 4	Expert 5	Expert 6	Number of Agreement	I-CVI	Pc	Kappa
Int 1	3	4	4	3	3	3	6	1	0.015625	1
Int 2	3	3	4	2	3	3	5	0.833333	0.09375	0.816092
Int 3	3	4	3	2	3	3	5	0.833333	0.09375	0.816092
Int 4	4	3	4	4	3	4	6	1	0.015625	1
Int 5	4	4	3	4	4	4	6	1	0.015625	1
Int 6	4	4	3	3	4	4	6	1	0.015625	1
Int 7	4	4	4	2	3	4	5	0.833333	0.09375	0.816092
Int 8	4	3	3	3	3	3	6	1	0.015625	1
Int 9	4	3	3	3	1	3	5	0.833333	0.09375	0.816092
S-CVI/Ave	0.925926
Total Agreement	5
S-CVI/UA	0.555556

## Sheet: Modification 
Calculation of I-CVI, S-CVI and Kappa for items of Modification construct in round 2
Items Id	Expert 1	Expert 2	Expert 3	Expert 4	Expert 5	Expert 6	Number of Agreement	I-CVI	Pc	Kappa
Mod 1	4	1	4	4	3	4	5	0.833333	0.09375	0.816092
Mod 2	3	3	4	4	3	3	6	1	0.015625	1
Mod 3	4	3	2	3	3	3	5	0.833333	0.09375	0.816092
Mod 4	4	2	4	3	3	4	5	0.833333	0.09375	0.816092
Mod 5	4	2	3	2	3	3	4	0.666667	0.234375	0.564626
Mod 6	3	2	3	2	4	3	4	0.666667	0.234375	0.564626
Mod 7	3	2	3	3	4	3	5	0.833333	0.09375	0.816092
S-CVI/Ave	0.809524
Total Agreement	1
S-CVI/UA	0.142857

## Sheet: SaaS Quality
Calculation of I-CVI, S-CVI and Kappa for items of SaaS Quality construct in round 2
Items Id	Expert 1	Expert 2	Expert 3	Expert 4	Expert 5	Expert 6	Number of Agreement	I-CVI	Pc	Kappa
QA 1	4	4	4	4	4	4	6	1	0.015625	1
QA 2	4	4	3	4	4	4	6	1	0.015625	1
QA 3	3	4	3	4	4	3	6	1	0.015625	1
QA 4	3	4	3	4	4	4	6	1	0.015625	1
QA 5	3	4	3	4	4	4	6	1	0.015625	1
QA 6	4	4	3	4	3	4	6	1	0.015625	1
QA 7	4	4	3	4	4	4	6	1	0.015625	1
QA 8	4	4	3	4	4	3	6	1	0.015625	1
QA 9	4	4	3	4	3	4	6	1	0.015625	1
QA 10	4	4	3	4	3	3	6	1	0.015625	1
QA 11	4	4	2	4	4	4	5	0.833333	0.09375	0.816092
QA 12	3	4	4	4	4	4	6	1	0.015625	1
QA 13	3	4	4	4	4	4	6	1	0.015625	1
S-CVI/Ave	0.987179
Total Agreement	10
S-CVI/UA	0.769231
